Pneumonia plus Panel (PNplus) detects 15 bacteria (in semi-quantitative log bin values from  $10^4$  to  $> 10^7$ ), 7 antibiotic resistance markers (meca/C/MRE), CTX-M, KPC, VIM, IMP, NDM, OXA-48 like), 3 atypical bacteria (AB), and 8 viral classes directly from bronchoalveolar lavage (BAL)-like and sputum-like specimens (including endotracheal aspirates) in about 1 hr. This study compared PNplus results to standard of care testing (SOC).

**Methods:** 2476 samples (1234 BAL-like; 1242 sputum-like) were tested at 52 laboratories from 13 European countries and Israel by PNplus and SOC. SOC varied by site and physician prescription. Pathogen detection rates were compared. PNplus bin values and SOC descriptive or numerical quantities were evaluated for 1297 bacterial detections.

**Results:** 13 samples (0.5%) gave invalid PNplus results. 3278 bacteria in PNplus were detected by PNplus and/or SOC. SOC detected 1878 bacteria (57.1%) compared to 3128 bacteria (95.8%) for PNplus ( $p < 0.0001$ ). SOC detected 73 AB (70.9%) and 134 viruses (21.1%), PNplus detected 93 AB (90.3%) and 618 viruses (97.9%) ( $p < 0.0001$ ). Mean number of analytes/sample detected by PNplus and SOC were 1.99 and 1.44, respectively. PNplus bin values were less than SOC, equal to SOC or greater than SOC in 5.9%, 25.4% and 69.6% of results, respectively. PNplus values were on average  $> 1$  log than SOC values (58.5% 1-2 logs; 11.0% 3-4 logs). PNplus identified 98.2% of MRSA and SOC 55.6%. All gram-negative resistance markers were detected at least once. PNplus and SOC results were fully concordant (positive or negative) or partially concordant for 49.1% and 26.4% of samples, respectively.

**Conclusion:** PNplus detected significantly more potential pathogens than SOC. Lack of routine SOC viral testing was a missed opportunity to define the cause of pneumonia. Semi-quantification may assist in understanding the significance of the pathogens detected. Pathogen and resistance marker detection in about 1 hr could dramatically impact antimicrobial use and enhance patient outcomes.

**Disclosures:** Christine C. Ginocchio, PhD, MT(ASCP), bioMérieux (Employee) bioMérieux (Employee, Shareholder) Barbara Mauerhofer, Pharmacist, bioMérieux (Employee) Cory Rindlisbacher, n/a, BioFire Diagnostics (Employee) Carolina Garcia, BS, bioMérieux (Employee)

#### 649. Clinical Implementation of a Rapid Susceptibility Testing Procedure, Directly From a Positive Blood Culture Using the Vitek<sup>2</sup> System on Gram Negative Rods

Charma Henry, MLS<sup>1</sup>; Dustin Evans, MT<sup>1</sup>; Daniel Navas, MLS(ASCP)<sup>2</sup>; Arleen Barker, MLS<sup>1</sup>; Chonnapat Somyos, MT<sup>1</sup>; Melissa Rodriguez, MLS<sup>1</sup>; Nahid Rahimzadeh, MLS<sup>1</sup>; Victoria Silva, MLS<sup>1</sup>; Amy Carr, PharmD<sup>2</sup>; Angela Charles, MLS (ASCP)<sup>1</sup>; Jose Alexander, MD<sup>2</sup>; <sup>1</sup>AdventHealth, Orlando, Florida; <sup>2</sup>AdventHealth Orlando, Orlando, Florida

**Session:** P-25. Diagnostics: Bacteriology/mycobacteriology

**Background:** The national average of identification and susceptibility for organisms isolated from positive blood culture to final susceptibility based on growth on solid media is 48 hours. The goal of this research was to prove that the Vitek<sup>2</sup> (bioMérieux, Inc.) system can provide an accurate and reliable susceptibility result directly from positive blood culture for Gram negative rods and reduce the turnaround time (TAT) from positive blood culture to the final susceptibility.

**Methods:** An FDA-modified validation procedure was performed on positive blood cultures directly from the bottle to the VITEK<sup>2</sup> System for susceptibility testing. The protocol tested and validated an aliquot of 50uL of blood directly from the positive bottle into 10 mL of saline (1:200). The solution was vortexed and 3mL were placed in the VITEK<sup>2</sup> test tube. This protocol was intended only for Gram negative rods using the AST-GN70, AST-GN81 & AST-GN801 cards. This protocol followed the CLSI M52 and M100 guidelines.

**Results:** 515 organisms from clinical blood culture samples from July 2018 to October 2019 were evaluated. Organisms included, but were not limited to: *E. coli*, *K. pneumoniae*, *Enterobacter spp.*, and *P. aeruginosa*, *Proteus spp.*, *Salmonella spp.*, *Acinetobacter spp.*, and *S. maltophilia*. There were 5,201 drug/bug combinations. AdventHealth Orlando achieved an essential agreement of 99.32% (n=5,166), minor error 0.74% (n=39) major error 0.02% (n=1) and very major error 0.49% (n=2). A 100% agreement was achieved on detection of ESBL, CRE, and MDR organisms.

**Conclusion:** Rapid direct blood culture protocol using the VITEK<sup>2</sup> System and the AST-GN cards is accurate, reliable and can be performed with less than 1 minute hands-on time. The protocol can be implemented in any laboratory at no additional costs or modification where the current VITEK<sup>2</sup> AST-GN panels are in use. This protocol was clinically implemented at AdventHealth Orlando on July 15, 2019. Compared with the national average of 72 hours, the TAT obtained during this study was 23 hours from positive blood culture to final susceptibility, a significant reduction of 25 hours. The authors encourage bioMérieux Inc. to evaluate and explore the opportunity to expand the use of the VITEK<sup>2</sup> system for this application with the appropriate clinical trial.

**Disclosures:** All Authors: No reported disclosures

#### 650. Clinical Performance Evaluation of Virtuo Blood Culture System in a Tertiary Care Hospital

Miguel A. Chavez, MD, MSc<sup>1</sup>; Satish Munigala, MBBS, MPH<sup>2</sup>; Carey-Ann Burnham, PhD<sup>3</sup>; Melanie L. Yarbrough, PhD<sup>2</sup>; David K. Warren, MD, MPH<sup>3</sup>; <sup>1</sup>Barnes Jewish Hospital, St. Louis, Missouri; <sup>2</sup>Washington University School of Medicine in St. Louis, St. Louis, Missouri; <sup>3</sup>Washington University, St. Louis, Missouri

**Session:** P-25. Diagnostics: Bacteriology/mycobacteriology

**Background:** Bloodstream infections are a major cause of morbidity and mortality. BACT/ALERT VIRTUO (VIRTUO) blood culture system is an automated, closed system used with resin-containing media which may enhance the growth of microorganisms. Our objective was to assess the real-world performance of the VIRTUO system.

**Methods:** We retrospectively reviewed all blood cultures performed between January-December 2018 (VersaTREK) and January-December 2019 (VIRTUO) at a 1250-bed academic medical center. Blood culture positivity rates, contamination rates, and time from collection to arrival in the laboratory were compared pre- versus post-VIRTUO implementation. Contamination was defined as a single blood culture with common skin microbiota.

**Results:** A total of 101803 blood cultures were performed during the study period: 48969 (48.1%) were processed with VersaTREK system and 52834 (51.9%) with VIRTUO system. A decreased median time from collection until arrival to the laboratory was seen post-implementation (2.0 pre- vs. 0.8 hours post-implementation,  $p < 0.001$ ). The positivity rate increased from 3987 (8.1%) pre-implementation to 6141 (11.6%) post-implementation ( $p < 0.001$ ) (Table and Figure). *Staphylococcus aureus* was the most frequently isolated species for both periods and had higher recovery rate with the VIRTUO system (717 (1.5%) pre- vs. 1764 (3.3%) post-implementation,  $p < 0.001$ ). Higher recovery rate was also noted for other *Staphylococcus spp.* in the post-implementation period (985 (2.0%) pre- vs. 1644 (3.1%) post-implementation,  $p < 0.001$ ). No difference in the organism recovery rate was noted for *Streptococcus spp.*, *Enterococcus faecium*, *E. faecalis*, *Pseudomonas aeruginosa*, *Enterobacteriales*, and *Candida spp.* The inpatient contamination rate was higher post-implementation (1.5% pre- vs. 1.9% post-implementation,  $p < 0.001$ ).

Comparison of blood culture positivity rate pre- vs. post-implementation, by culture location

Table. Comparison of blood culture positivity rate pre- vs. post-implementation, by culture location

|                     | Entire study period |                 | Pre-implementation<br>1/1/2018 to 1/13/2019 |                 | Post-implementation<br>1/14/2019 to 12/13/2019 |                 | p      |
|---------------------|---------------------|-----------------|---------------------------------------------|-----------------|------------------------------------------------|-----------------|--------|
|                     | Total               | Positive result | Total                                       | Positive result | Total                                          | Positive result |        |
| All locations       | 101803              | 10128 (10.0%)   | 48969                                       | 3987 (8.1%)     | 52834                                          | 6141 (11.6%)    | <0.001 |
| Inpatient location  | 71621               | 6580 (9.2%)     | 36972                                       | 2627 (7.1%)     | 34649                                          | 3953 (11.4%)    | <0.001 |
| Emergency dept.     | 15023               | 2111 (14.1%)    | 6225                                        | 809 (13.0%)     | 8798                                           | 1302 (14.8%)    | 0.002  |
| Outpatient location | 15159               | 1437 (9.5%)     | 5772                                        | 551 (9.6%)      | 9387                                           | 886 (9.4%)      | 0.826  |

Daily positivity rate for blood cultures processed at BJH during the study period

Figure. Daily positivity rate for blood cultures processed at BJH during the study period

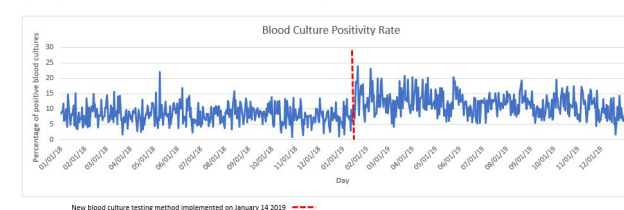

**Conclusion:** The VIRTUO system showed a higher rate of positive blood cultures compared to the VersaTREK system primarily from a higher detection of *Staphylococcus spp.* Further studies are needed to assess whether an increased rate of positive blood cultures is associated with changes in management and clinical outcomes.

**Disclosures:** All Authors: No reported disclosures

#### 651. Comparative Analysis Between Bacterial And Fungal Malignant Otitis Externa

Fatma Hammami, MD<sup>1</sup>; Makram Koubaa, MD<sup>1</sup>; Amal Chakroun, MD<sup>1</sup>; Fatma Smaoui, MD<sup>1</sup>; Khaoula Rekiq, MD<sup>1</sup>; Emma Elleuch, MD<sup>1</sup>; Chakib Marrakchi, MD<sup>1</sup>; Mounir Ben Jemaa, MD<sup>1</sup>; <sup>1</sup>Infectious Diseases Department, Hedi Chaker University Hospital, University of Sfax, Tunisia, Sfax, Tunisia

**Session:** P-25. Diagnostics: Bacteriology/mycobacteriology

**Background:** Malignant otitis externa is a fatal infection of the external ear and temporal bone. *Pseudomonas aeruginosa* is the most common causative organism, while fungi are a rare cause of malignant otitis externa. We aimed to compare the clinical, therapeutic and evolutionary features between bacterial and fungal malignant otitis externa.

**Methods:** We conducted a retrospective study including all patients hospitalized for malignant otitis externa in the infectious diseases department between 2000 and 2018.

**Results:** Overall, we encountered 82 cases of malignant otitis externa, among which there were 54 cases (65.9%) of bacterial malignant otitis externa (BMO) and 28 cases (34.1%) of fungal malignant otitis externa (FMO). The males were predominant among BMO cases (57.4% vs 50%;  $p=0.5$ ). Patients with FMO were significantly older ( $70 \pm 9$  years vs  $61 \pm 10$  years;  $p < 0.001$ ) and had medical history of diabetes mellitus more frequently (96.4% vs 77.8%;  $p=0.03$ ). The use of topical corticosteroids was significantly more reported among FMO cases (28.6% vs 5.6%;  $p=0.006$ ). Otagia (96.4% vs 81.5%), otorrhea (75% vs 66.7%) and cephalalgia (46.4% vs 42.6%) were the
